# Supplementary material
Source: PubMed Central journal article supplement (PMC4324355)
Supplement: NIHMS638674-supplement-Supplementary_Material.pdf [file NIHMS638674-supplement-Supplementary_Material.pdf]

## **Supplementary Material**

### **Genetic Variation in Imprinted Genes is Associated with Risk of Late-Onset**

#### **Alzheimer's disease**

Mamoonah Chaudhry<sup>1</sup>, Xingbin Wang<sup>2</sup>, Mikhil N. Bamne<sup>2</sup> Shahida Hasnain<sup>1,3</sup> F.Yesim Demirci<sup>2</sup>, Oscar L. Lopez<sup>4,5</sup>, M. Ilyas Kamboh<sup>2,5</sup>

<sup>1</sup> Department of Microbiology and Molecular Genetics, University of the Punjab, Lahore, Pakistan

<sup>2</sup> Department of Human Genetics, University of Pittsburgh, Pittsburgh, PA, USA

<sup>3</sup> The Women University Multan, Multan, Pakistan

<sup>4</sup> Department of Neurology, University of Pittsburgh, Pittsburgh, PA, USA

<sup>5</sup> Alzheimer's Disease Research Center, University of Pittsburgh, Pittsburgh, PA, USA

**Supplementary Table 1: Results of single locus analysis and Versatile Gene-Based Association analysis in 93 imprinted genes**

| Gene              | CHR <sup>1</sup> | Most significant SNP | Base Pair Location <sup>2</sup> | OR <sup>3</sup> | P-value <sup>4</sup> | SNPs     | Total SNPs | TagSNPs | P-Value Threshold for Significance | Gene Location <sup>5</sup> | Test     | P-value <sup>6</sup> |
|-------------------|------------------|----------------------|---------------------------------|-----------------|----------------------|----------|------------|---------|------------------------------------|----------------------------|----------|----------------------|
|                   |                  |                      |                                 |                 |                      | (P<0.05) |            |         |                                    |                            |          |                      |
| <i>WT1</i>        | 11               | rs5030328            | 32366048                        | 0.632           | 0.0054               | 3        | 29         | 17      | 0.002941                           | 32365897-32413657          | 105.576  | 0.01004              |
| <i>ZC3H12C</i>    | 11               | rs4754425            | 109547367                       | 0.836           | 0.0084               | 16       | 30         | 11      | 0.004545                           | 109469296-109547776        | 98.371   | 0.02273              |
| <i>DLGAP2</i>     | 8                | rs6992443            | 1637345                         | 1.537           | 0.0009               | 17       | 95         | 60      | 0.000833                           | 1436975-1644049            | 192.746  | 0.03648              |
| <i>GPR1</i>       | 2                | rs16838070           | 206775748                       | 1.245           | 0.0058               | 4        | 17         | 14      | 0.003571                           | 206748284-206791016        | 42.552   | 0.03711              |
| <i>IGF2</i>       | 11               | rs3741205            | 2126460                         | 1.121           | 0.097                | 0        | 23         | 17      | 0.002941                           | 2106922-2127409            | 77.281   | 0.05434              |
| <i>PHACTR2</i>    | 6                | rs6915880            | 144083752                       | 0.829           | 0.0029               | 16       | 102        | 75      | 0.000667                           | 143971009-144194015        | 172.908  | 0.05566              |
| <i>CDKN1C</i>     | 11               | rs452338             | 2864771                         | 1.154           | 0.0324               | 1        | 3          | 2       | 0.025                              | 2861023-2863571            | 7.806    | 0.07744              |
| <i>SLC22A18AS</i> | 11               | rs452338             | 2864771                         | 1.154           | 0.0324               | 2        | 17         | 14      | 0.003571                           | 2865902-2881751            | 30.681   | 0.08135              |
| <i>GNAS</i>       | 20               | rs6092704            | 56901873                        | 1.258           | 0.0366               | 2        | 53         | 30      | 0.001667                           | 56848189-56919645          | 88.636   | 0.11100              |
| <i>AXL</i>        | 19               | rs4802111            | 46425899                        | 0.879           | 0.0389               | 2        | 14         | 12      | 0.004167                           | 46416947-46459511          | 23.756   | 0.12700              |
| <i>KCNQ1</i>      | 11               | rs2283155            | 2504751                         | 1.218           | 0.0017               | 10       | 171        | 132     | 0.000379                           | 2422796-2826916            | 217.203  | 0.12900              |
| <i>DLX5</i>       | 7                | rs12533469           | 96487458                        | 0.859           | 0.0229               | 1        | 5          | 5       | 0.01                               | 96487637-96492079          | 8.556    | 0.13700              |
| <i>SLC22A2</i>    | 6                | rs2450974            | 160558735                       | 1.331           | 0.0088               | 7        | 45         | 8       | 0.00625                            | 160557783-160599953        | 94.493   | 0.13900              |
| <i>FAM50B</i>     | 6                | rs3196512            | 3796544                         | 1.17            | 0.0128               | 1        | 6          | 5       | 0.01                               | 3794630-3796550            | 10.517   | 0.14100              |
| <i>MIR371A</i>    | 19               | rs12460972           | 58982309                        | 0.877           | 0.065                | 0        | 4          | 4       | 0.0125                             | 58982740-58982807          | 6.385    | 0.16500              |
| <i>PRIM2</i>      | 6                | rs1618210            | 57292838                        | 1.141           | 0.0473               | 2        | 28         | 15      | 0.003333                           | 57290380-57621335          | 41.679   | 0.16900              |
| <i>NNAT</i>       | 20               | rs3795148            | 35581911                        | 0.91            | 0.1862               | 0        | 1          | 1       | 0.05                               | 35583020-35585504          | 1.747    | 0.16900              |
| <i>WIF1</i>       | 12               | rs3782497            | 63746341                        | 0.764           | 0.0442               | 1        | 18         | 7       | 0.007143                           | 63730670-63801613          | 27.303   | 0.17200              |
| <i>MAGI2</i>      | 7                | rs1978326            | 78013532                        | 0.658           | 0.0043               | 38       | 588        | 417     | 0.00012                            | 77484309-78920826          | 2023.158 | 0.18400              |
| <i>KLF14</i>      | 7                | rs290804             | 130071412                       | 1.131           | 0.0952               | 0        | 3          | 2       | 0.025                              | 130067935-130069428        | 5.099    | 0.18700              |
| <i>PLAGL1</i>     | 6                | rs9403542            | 144347261                       | 1.172           | 0.0133               | 4        | 41         | 34      | 0.001471                           | 144303129-144427428        | 55.471   | 0.20000              |
| <i>NDN</i>        | 15               | rs699328             | 21480200                        | 0.916           | 0.2142               | 0        | 1          | 1       | 0.05                               | 21481646-21483543          | 1.543    | 0.20300              |
| <i>BLCAP</i>      | 20               | rs10854179           | 35589783                        | 0.906           | 0.1684               | 0        | 3          | 2       | 0.025                              | 35579232-35589747          | 4.529    | 0.20800              |
| <i>ANO1</i>       | 11               | rs3740722            | 69711744                        | 0.764           | 0.003                | 2        | 61         | 43      | 0.001163                           | 69602055-69713299          | 78.126   | 0.21200              |

|                  |    |                |           |       |        |    |     |     |          |                     |         |         |
|------------------|----|----------------|-----------|-------|--------|----|-----|-----|----------|---------------------|---------|---------|
| <i>ZNF331</i>    | 19 | rs2708771      | 58720819  | 0.803 | 0.006  | 2  | 38  | 24  | 0.002083 | 58715988-58775335   | 48.244  | 0.23400 |
| <i>MEST1</i>     | 7  | rs1990786      | 129912737 | 0.888 | 0.1677 | 0  | 2   | 0   | 0        | 129914133-129918249 | 2.566   | 0.24400 |
| <i>SNORD64</i>   | 15 | rs1991274      | 22781495  | 0.843 | 0.1919 | 0  | 2   | 1   | 0.05     | 22781339-22781406   | 2.612   | 0.24900 |
| <i>KCNQ1OT1</i>  | 11 | rs4930139      | 2587879   | 0.853 | 0.0424 | 2  | 33  | 23  | 0.002174 | 2586133-2677804     | 40.133  | 0.25500 |
| <i>SNORD108</i>  | 15 | rs1991274      | 22781495  | 0.843 | 0.1919 | 0  | 2   | 1   | 0.05     | 22783164-22783233   | 2.612   | 0.26000 |
| <i>L3MBTL1</i>   | 20 | SNP20-41598136 | 41598136  | 1.264 | 0.0304 | 2  | 13  | 11  | 0.004545 | 41569733-41603949   | 15.499  | 0.27000 |
| <i>HYMAI</i>     | 6  | rs9321957      | 144373184 | 0.912 | 0.1565 | 0  | 2   | 2   | 0.025    | 144365727-144371560 | 2.414   | 0.27900 |
| <i>COPG2</i>     | 7  | rs10128        | 129938930 | 0.826 | 0.0659 | 0  | 21  | 9   | 0.005556 | 129933315-130004138 | 24.069  | 0.29000 |
| <i>SNORD109A</i> | 15 | rs1977036      | 23074798  | 1.004 | 0.9647 | 0  | 1   | 1   | 0.05     | 23074582-23074649   | 0.002   | 0.306   |
| <i>MEST</i>      | 7  | rs1990786      | 129912737 | 0.888 | 0.1677 | 0  | 5   | 1   | 0.05     | 129913251-129933374 | 5.444   | 0.30700 |
| <i>SLC22A18</i>  | 11 | rs427398       | 2895626   | 0.885 | 0.0451 | 1  | 24  | 20  | 0.0025   | 2877526-2903052     | 26.67   | 0.31300 |
| <i>MIR296</i>    | 20 | rs6026544      | 56827815  | 0.942 | 0.3293 | 0  | 1   | 1   | 0.05     | 56826064-56826144   | 0.952   | 0.315   |
| <i>DLK1</i>      | 14 | rs10132598     | 100269286 | 1.101 | 0.2304 | 0  | 3   | 3   | 0.016667 | 100262954-100271220 | 3.07    | 0.32000 |
| <i>TFPI2</i>     | 7  | rs4517         | 93353929  | 1.149 | 0.0474 | 1  | 5   | 5   | 0.01     | 93352644-93358239   | 5.626   | 0.32900 |
| <i>IGF2-AS</i>   | 11 | rs3741205      | 2126460   | 1.121 | 0.097  | 0  | 12  | 8   | 0.00625  | 2118333-2126472     | 13.351  | 0.33700 |
| <i>NTM</i>       | 11 | rs656644       | 131287579 | 0.812 | 0.0067 | 18 | 421 | 299 | 0.000167 | 130745580-131711926 | 450.612 | 0.34000 |
| <i>MIR483</i>    | 11 | rs3213223      | 2113506   | 0.906 | 0.1919 | 0  | 4   | 3   | 0.016667 | 2111939-2112015     | 4.265   | 0.34400 |
| <i>WT1-AS</i>    | 11 | rs7946086      | 32417666  | 0.906 | 0.1577 | 0  | 5   | 4   | 0.0125   | 32413860-32418196   | 4.887   | 0.35400 |
| <i>GRB10</i>     | 7  | rs11770199     | 50653096  | 0.748 | 0.0003 | 2  | 57  | 39  | 0.001282 | 50625253-50828653   | 57.645  | 0.37800 |
| <i>ZNF215</i>    | 11 | rs1388534      | 6923075   | 1.406 | 0.0245 | 1  | 18  | 11  | 0.004545 | 6904229-6935854     | 17.614  | 0.39300 |
| <i>PEG3</i>      | 19 | rs1010231      | 62026441  | 0.916 | 0.1642 | 0  | 11  | 5   | 0.01     | 62015659-62016973   | 12.39   | 0.40700 |
| <i>PHLDA2</i>    | 11 | rs4758535      | 2905210   | 0.894 | 0.2798 | 0  | 2   | 1   | 0.05     | 2906078-2907226     | 1.572   | 0.410   |
| <i>MEG3</i>      | 14 | rs4906024      | 100391479 | 0.803 | 0.0117 | 2  | 53  | 23  | 0.002174 | 100362197-100397113 | 48.32   | 0.42500 |
| <i>ZFAT</i>      | 8  | rs12541381     | 135719030 | 1.157 | 0.0487 | 1  | 111 | 77  | 0.000649 | 135559212-135794474 | 106.931 | 0.44700 |
| <i>ZNF597</i>    | 16 | rs12737        | 3426286   | 0.857 | 0.0619 | 0  | 9   | 5   | 0.01     | 3426110-3433491     | 7.82    | 0.45200 |
| <i>ZIM2</i>      | 19 | rs2286751      | 61985206  | 0.89  | 0.1217 | 0  | 18  | 10  | 0.005    | 61977739-62043909   | 15.906  | 0.45200 |
| <i>LIN28B</i>    | 6  | rs12215957     | 105511206 | 1.437 | 0.0195 | 1  | 14  | 11  | 0.004545 | 105511615-105637900 | 12.547  | 0.46200 |
| <i>GLIS3</i>     | 9  | rs1340252      | 4121657   | 1.241 | 0.0015 | 18 | 334 | 243 | 0.000206 | 3814127-4290035     | 665.281 | 0.46300 |
| <i>SNURF</i>     | 15 | rs2732020      | 22773397  | 0.775 | 0.0212 | 1  | 9   | 4   | 0.0125   | 22751227-22774822   | 7.133   | 0.48200 |

|                   |    |            |           |       |        |   |     |    |          |                     |        |         |
|-------------------|----|------------|-----------|-------|--------|---|-----|----|----------|---------------------|--------|---------|
| <i>SNORD115-1</i> | 15 | rs2714732  | 22965530  | 1.075 | 0.2518 | 0 | 2   | 2  | 0.025    | 22966962-22967044   | 1.364  | 0.482   |
| <i>KCNK9</i>      | 8  | rs7828107  | 140756023 | 0.859 | 0.0159 | 1 | 46  | 34 | 0.001471 | 140693985-140784481 | 42.4   | 0.48300 |
| <i>KCNQ1DN</i>    | 11 | rs2239897  | 2848541   | 0.924 | 0.4892 | 0 | 1   | 1  | 0.05     | 2847838-2849911     | 0.478  | 0.490   |
| <i>TP73</i>       | 1  | rs7515164  | 3644607   | 0.768 | 0.0495 | 1 | 41  | 33 | 0.001515 | 3558988-3642625     | 77.825 | 0.50100 |
| <i>RTL1</i>       | 14 | rs11851174 | 100415257 | 0.911 | 0.2339 | 0 | 5   | 5  | 0.01     | 100416744-100420937 | 3.948  | 0.50400 |
| <i>ZFAT-AS1</i>   | 8  | rs879104   | 135678719 | 1.082 | 0.2413 | 0 | 11  | 2  | 0.025    | 135679495-135682114 | 7.34   | 0.51900 |
| <i>MKRN3</i>      | 15 | rs12148893 | 21364755  | 0.74  | 0.1799 | 0 | 5   | 4  | 0.0125   | 21361546-21364259   | 3.579  | 0.54200 |
| <i>SGK2</i>       | 20 | rs763227   | 41638475  | 0.868 | 0.0618 | 0 | 16  | 14 | 0.003571 | 41621048-41647687   | 12.722 | 0.55900 |
| <i>MIR298</i>     | 20 | rs6026544  | 56827815  | 0.942 | 0.3293 | 0 | 2   | 2  | 0.025    | 56826675-56826763   | 0.994  | 0.571   |
| <i>DDC</i>        | 7  | rs930707   | 50587172  | 1.667 | 0.0315 | 2 | 49  | 23 | 0.002174 | 50493627-50600648   | 39.746 | 0.57300 |
| <i>PPP1R9A</i>    | 7  | rs10233060 | 94642028  | 1.279 | 0.0218 | 4 | 111 | 41 | 0.00122  | 94374884-94763663   | 84.442 | 0.58200 |
| <i>PEG10</i>      | 7  | rs10239188 | 94137365  | 0.88  | 0.2355 | 0 | 5   | 4  | 0.0125   | 94123572-94136942   | 3.276  | 0.60000 |
| <i>ATP10A</i>     | 15 | rs11161237 | 23633521  | 1.689 | 0.0008 | 5 | 107 | 80 | 0.000625 | 23474952-23659442   | 93.622 | 0.60100 |
| <i>MIMT1</i>      | 19 | rs373361   | 62051244  | 1.058 | 0.5981 | 0 | 1   | 1  | 0.05     | 62044081-62051734   | 0.278  | 0.606   |
| <i>SGCE</i>       | 7  | rs10274271 | 94117082  | 0.887 | 0.1348 | 0 | 10  | 2  | 0.025    | 94052471-94123457   | 6.508  | 0.61100 |
| <i>NPAP1</i>      | 15 | rs12902137 | 22475756  | 1.08  | 0.2766 | 0 | 11  | 7  | 0.007143 | 22471633-22479686   | 6.508  | 0.618   |
| <i>PSIMCT-1</i>   | 20 | rs6059929  | 29601093  | 0.921 | 0.31   | 0 | 3   | 3  | 0.016667 | 29598845-29599680   | 1.317  | 0.626   |
| <i>DIRAS3</i>     | 1  | rs11801053 | 68284759  | 0.855 | 0.3727 | 0 | 5   | 3  | 0.016667 | 68284232-68289048   | 2.401  | 0.665   |
| <i>IGF2R</i>      | 6  | rs8191821  | 160391742 | 0.703 | 0.0237 | 3 | 93  | 48 | 0.001042 | 160310120-160447573 | 69.024 | 0.69600 |
| <i>MAGEL2</i>     | 15 | rs11161318 | 21439359  | 0.881 | 0.2069 | 0 | 5   | 3  | 0.016667 | 21439788-21444086   | 1.982  | 0.69900 |
| <i>CTNNB1</i>     | 3  | rs4135385  | 41254444  | 1.094 | 0.2173 | 0 | 7   | 5  | 0.01     | 41215945-41256943   | 3.576  | 0.71500 |
| <i>NAA60</i>      | 16 | rs17793994 | 3474832   | 1.605 | 0.0897 | 0 | 19  | 10 | 0.005    | 3433668-3476964     | 9.651  | 0.72300 |
| <i>DGCR6</i>      | 22 | rs2005883  | 17276464  | 0.862 | 0.0942 | 0 | 9   | 8  | 0.00625  | 17273735-17279601   | 5.003  | 0.72900 |
| <i>PWRN1</i>      | 15 | rs8025557  | 22377651  | 1.067 | 0.3095 | 0 | 4   | 3  | 0.016667 | 22354396-22384019   | 1.221  | 0.742   |
| <i>UBE3A</i>      | 15 | rs7167529  | 23198484  | 0.909 | 0.2036 | 0 | 13  | 9  | 0.005556 | 23133488-23235268   | 6.474  | 0.75700 |
| <i>INPP5F</i>     | 10 | rs3847492  | 121575588 | 1.102 | 0.1909 | 0 | 18  | 13 | 0.003846 | 121475548-121578652 | 8.873  | 0.75900 |
| <i>OSBPL5</i>     | 11 | rs7928630  | 3136036   | 1.151 | 0.0244 | 1 | 49  | 41 | 0.00122  | 3064921-3143158     | 32.886 | 0.76600 |
| <i>RBP5</i>       | 12 | rs3829815  | 7166783   | 1.113 | 0.1463 | 0 | 6   | 5  | 0.01     | 7167553-7172733     | 2.566  | 0.77400 |
| <i>CPA4</i>       | 7  | rs10253631 | 129736749 | 1.394 | 0.1121 | 0 | 18  | 10 | 0.005    | 129720209-129751256 | 6.953  | 0.78600 |
| <i>GNAS-AS1</i>   | 20 | rs6026560  | 56859923  | 0.921 | 0.2851 | 0 | 17  | 8  | 0.00625  | 56827367-56859353   | 4.977  | 0.820   |

|                |    |               |           |       |        |   |    |    |          |                     |        |         |
|----------------|----|---------------|-----------|-------|--------|---|----|----|----------|---------------------|--------|---------|
| <i>ZDBF2</i>   | 2  | rs13000757    | 206854151 | 0.944 | 0.3494 | 0 | 11 | 5  | 0.01     | 206847767-206887393 | 1.899  | 0.827   |
| <i>SNRPN</i>   | 15 | rs2732020     | 22773397  | 0.775 | 0.0212 | 1 | 70 | 60 | 0.000833 | 22619886-22774822   | 50.596 | 0.82800 |
| <i>DGCR6L</i>  | 22 | rs1210829     | 18688800  | 1.112 | 0.5138 | 0 | 3  | 2  | 0.025    | 18681760-18687628   | 0.497  | 0.830   |
| <i>RBI</i>     | 13 | rs2854344     | 47895694  | 1.173 | 0.2371 | 0 | 25 | 8  | 0.00625  | 47775883-47954027   | 9.423  | 0.83900 |
| <i>H19</i>     | 11 | rs217228      | 1971285   | 1.062 | 0.3557 | 0 | 9  | 5  | 0.01     | 1972981-1975641     | 2.501  | 0.842   |
| <i>NAPIL5</i>  | 4  | rs2924358     | 89834752  | 1.191 | 0.3454 | 0 | 4  | 4  | 0.0125   | 89836088-89838046   | 1.353  | 0.846   |
| <i>INS</i>     | 11 | rs689         | 2138800   | 1.037 | 0.5978 | 0 | 3  | 3  | 0.016667 | 2137584-2139015     | 0.841  | 0.859   |
| <i>NLRP2</i>   | 19 | rs269913      | 60173481  | 0.915 | 0.1499 | 0 | 21 | 16 | 0.003125 | 60168463-60204322   | 8.976  | 0.86200 |
| <i>LRRTM1</i>  | 2  | SNP2-80383573 | 80383573  | 0.915 | 0.6406 | 0 | 2  | 2  | 0.025    | 80382513-80384998   | 0.218  | 0.889   |
| <i>SLC22A3</i> | 6  | rs8187724     | 160777939 | 0.598 | 0.0285 | 1 | 97 | 20 | 0.0025   | 160689394-160793601 | 10.44  | 0.99700 |

<sup>1</sup> Chromosomal location; <sup>2</sup> Base-Pair Position of most significant SNP in single locus analysis; <sup>3</sup> Odds ratio; <sup>4</sup> *P*-value from single site analysis; <sup>5</sup> Gene start and stop position; <sup>6</sup> *P*-value from gene-based analysis

**Supplementary Table 2.** Significant windows in 3 genes in haplotype analysis

| Gene                             | Window <sup>1</sup>                                | Haplotype | Control Frequency | Case Frequency | Total Frequency | Global P <sup>2</sup> |
|----------------------------------|----------------------------------------------------|-----------|-------------------|----------------|-----------------|-----------------------|
| <i>GPR1</i><br>(12) <sup>3</sup> | rs2010572<br>rs16838070<br>rs6715398<br>rs16838083 | AAAA      | 0.000789763       | NA             | 0.000328235     | 0.024761              |
|                                  |                                                    | AAGA      | 0.083084537       | 0.100445689    | 0.093065832     |                       |
|                                  |                                                    | AAGC      | 0.034322224       | 0.037522488    | 0.036131902     |                       |
|                                  |                                                    | AGAA      | 0.50912673        | 0.487606497    | 0.496781592     |                       |
|                                  |                                                    | AGGA      | 0.309922317       | 0.306602026    | 0.307999252     |                       |
|                                  |                                                    | AGGC      | 0.002733553       | 0.000433671    | 0.00144241      |                       |
|                                  |                                                    | GAGA      | 0.059367059       | 0.06738962     | 0.063981113     |                       |
|                                  |                                                    | GAGC      | 5.90E-07          | NA             | 1.53E-08        |                       |
|                                  |                                                    | GGAA      | NA                | NA             | 1.77E-11        |                       |
|                                  |                                                    | GGGA      | 0.000653227       | NA             | 0.00026965      |                       |
| <i>ZC3H12C</i><br>(24)           | rs10891068<br>rs10891069<br>rs622822<br>rs17110877 | AAAA      | 0.000531259       | 0.001186979    | 0.00090704      | 0.009801              |
|                                  |                                                    | AACA      | NA                | 7.92E-10       | 2.29E-10        |                       |
|                                  |                                                    | AACG      | 0.27347313        | 0.235063989    | 0.251425961     |                       |
|                                  |                                                    | GACG      | 0.002091647       | 0.001161893    | 0.00155762      |                       |
|                                  |                                                    | GGAA      | 0.705625951       | 0.736886981    | 0.723592859     |                       |
|                                  |                                                    | GGAG      | 0.000522215       | 0.000388909    | 0.000445883     |                       |
|                                  |                                                    | GGCA      | 0.000523374       | 0.004761051    | 0.002934515     |                       |
|                                  |                                                    | GGCG      | 0.017232423       | 0.020550198    | 0.019136121     |                       |
|                                  | rs661171<br>rs648594<br>rs10891068<br>rs10891069   | AAAA      | 0.001087091       | NA             | 0.000449939     | 0.012049              |
|                                  |                                                    | AAGG      | 0.020643165       | 0.015043506    | 0.017453215     |                       |
|                                  |                                                    | AGAA      | 0.000934797       | 0.000674566    | 0.000786042     |                       |
|                                  |                                                    | AGGG      | 0.26961052        | 0.276636366    | 0.273634948     |                       |
|                                  |                                                    | CAAA      | 0.271982479       | 0.235576382    | 0.251097013     |                       |
|                                  |                                                    | CAGA      | 0.002091679       | 0.001166899    | 0.001561587     |                       |
|                                  |                                                    | CAGG      | 0.41870498        | 0.449945809    | 0.43661882      |                       |

|  |                                                  |      |             |             |             |          |
|--|--------------------------------------------------|------|-------------|-------------|-------------|----------|
|  |                                                  | CGAA | 4.73E-10    | 1.99E-08    | 3.33E-09    |          |
|  |                                                  | CGGG | 0.014945287 | 0.020956451 | 0.018398434 |          |
|  | rs1564011<br>rs1381466<br>rs610086<br>rs661171   | AAAC | 0.000524483 | 0.0003716   | 0.000443274 | 0.022271 |
|  |                                                  | AAGA | 5.29E-09    | 0.000752222 | 0.0004545   |          |
|  |                                                  | AAGC | 0.276091077 | 0.243192226 | 0.257189348 |          |
|  |                                                  | AGAA | 0.250227174 | 0.254779376 | 0.252834344 |          |
|  |                                                  | AGAC | 0.007075217 | 0.011309129 | 0.009504191 |          |
|  |                                                  | AGGA | NA          | 0.00087843  | 0.000443665 |          |
|  |                                                  | AGGC | 0.003660331 | 0.006559489 | 0.005377715 |          |
|  |                                                  | CAGA | 0.000524309 | NA          | 0.000181184 |          |
|  |                                                  | CAGC | NA          | 0.000807088 | 0.000498965 |          |
|  |                                                  | CGAA | 0.000523856 | NA          | 0.000223971 |          |
|  |                                                  | CGAC | NA          | 3.57E-09    | 3.99E-10    |          |
|  |                                                  | CGGA | 0.041000229 | 0.035966036 | 0.038198384 |          |
|  |                                                  | CGGC | 0.420373317 | 0.445384401 | 0.434650459 |          |
|  | rs648594<br>rs10891068<br>rs10891069<br>rs622822 | AAAA | 0.000532446 | 0.000800246 | 0.000685131 | 0.022690 |
|  |                                                  | AAAC | 0.272543877 | 0.234761819 | 0.250857387 |          |
|  |                                                  | AGAC | 0.002091658 | 0.001161894 | 0.001557621 |          |
|  |                                                  | AGGA | 0.421544207 | 0.438840423 | 0.431510546 |          |
|  |                                                  | AGGC | 0.017797207 | 0.025820311 | 0.022365303 |          |
|  |                                                  | GAAC | 0.000928052 | 0.000688903 | 0.000790482 |          |
|  |                                                  | GGGA | 0.284562549 | 0.297926405 | 0.29223353  |          |
|  |                                                  | GGGC | 4.00E-09    | 2.21E-11    | 1.33E-10    |          |
|  | rs7117957<br>rs1564011<br>rs1381466<br>rs610086  | AAAG | NA          | NA          | 3.01E-13    | 0.025141 |
|  |                                                  | AAGG | NA          | 0.000394852 | 0.00022587  |          |
|  |                                                  | ACAG | 9.23E-12    | 0.001177239 | 0.000565001 |          |
|  |                                                  | ACGA | 0.00052379  | NA          | 0.000267003 |          |
|  |                                                  | ACGG | 0.438907991 | 0.465084017 | 0.454001881 |          |
|  |                                                  | CAAA | 0.000523878 | 4.98E-09    | 0.000313083 |          |

|  |                                                   |      |             |             |             |          |
|--|---------------------------------------------------|------|-------------|-------------|-------------|----------|
|  |                                                   | CAAG | 0.276092295 | 0.243945009 | 0.257688    |          |
|  |                                                   | CAGA | 0.257303063 | 0.266460103 | 0.262425955 |          |
|  |                                                   | CAGG | 0.003659052 | 0.007028372 | 0.005586511 |          |
|  |                                                   | CCAG | 0.000523702 | NA          | 0.000203041 |          |
|  |                                                   | CCGG | 0.02246623  | 0.015910403 | 0.018723654 |          |
|  | rs660222<br>rs7117957<br>rs1564011<br>rs1381466   | ACAA | 0.274263179 | 0.242164154 | 0.255906401 | 0.026424 |
|  |                                                   | ACAG | 0.259661664 | 0.270950199 | 0.26606435  |          |
|  |                                                   | ACCA | 0.000703994 | NA          | 0.000277696 |          |
|  |                                                   | ACCG | 0.022260515 | 0.014771007 | 0.017991659 |          |
|  |                                                   | GAAA | NA          | 0.000393878 | 0.000225483 |          |
|  |                                                   | GAAG | NA          | 2.70E-07    | 1.47E-06    |          |
|  |                                                   | GACA | 4.90E-10    | 0.00108491  | 0.000641326 |          |
|  |                                                   | GACG | 0.438935281 | 0.465206835 | 0.453997466 |          |
|  |                                                   | GCAA | 0.002172701 | 0.001435262 | 0.001719676 |          |
|  |                                                   | GCAG | 0.001480744 | 0.002876945 | 0.002318614 |          |
|  |                                                   | GCCG | 0.000521921 | 0.001116539 | 0.00085586  |          |
|  | rs10891069<br>rs622822<br>rs17110877<br>rs1026608 | AAAG | 0.000538708 | 0.001194559 | 0.000916111 | 0.028373 |
|  |                                                   | ACAG | NA          | 7.89E-10    | 7.89E-11    |          |
|  |                                                   | ACGA | 0.003664211 | 0.001163247 | 0.002227643 |          |
|  |                                                   | ACGG | 0.271861943 | 0.235024397 | 0.250715614 |          |
|  |                                                   | GAAA | 0.704586832 | 0.735746614 | 0.722495012 |          |
|  |                                                   | GAAG | 0.001031667 | 0.001132623 | 0.001088714 |          |
|  |                                                   | GAGG | 0.000522214 | 0.000388893 | 0.000445877 |          |
|  |                                                   | GCAA | 0.000523377 | 0.004761214 | 0.002934577 |          |
|  |                                                   | GCGA | NA          | 0.000388152 | 0.000222758 |          |
|  |                                                   | GCGG | 0.017271047 | 0.0202003   | 0.018953693 |          |
|  | rs622822<br>rs17110877<br>rs1026608<br>rs1026607  | AAAA | 0.704063682 | 0.735802853 | 0.722291882 | 0.032253 |
|  |                                                   | AAAG | 0.000521926 | NA          | 0.000222471 |          |
|  |                                                   | AAGG | 0.001571615 | 0.002327447 | 0.002005877 |          |



|                       |                                                   |      |             |             |             |          |
|-----------------------|---------------------------------------------------|------|-------------|-------------|-------------|----------|
|                       |                                                   | AGGG | 0.000523141 | 0.000389416 | 0.000446459 |          |
|                       |                                                   | CAAA | 0.000523362 | 0.00238093  | 0.001580339 |          |
|                       |                                                   | CAAG | NA          | 0.002323782 | 0.001333846 |          |
|                       |                                                   | CAGG | NA          | 1.01E-10    | 2.22E-11    |          |
|                       |                                                   | CGAA | 0.003659303 | 0.001552854 | 0.002450519 |          |
|                       |                                                   | CGGG | 0.289136971 | 0.255222719 | 0.269668607 |          |
| <i>DLGAP2</i><br>(89) | rs4256621<br>rs4876115<br>rs6558504<br>rs17064153 | AAAG | NA          | 3.26E-08    | 9.68E-09    |          |
|                       |                                                   | AAGA | 0.259394572 | 0.265298218 | 0.262783459 |          |
|                       |                                                   | GAAA | 0.482961391 | 0.503016646 | 0.494491506 |          |
|                       |                                                   | GAAG | NA          | 0.000435714 | 0.000247163 | 0.003875 |
|                       |                                                   | GAGA | 0.058270342 | 0.047283471 | 0.051948737 |          |
|                       |                                                   | GAGG | NA          | 4.08E-11    | 1.46E-11    |          |
|                       |                                                   | GGGA | 0.096555324 | 0.109653407 | 0.104071095 |          |
|                       |                                                   | GGGG | 0.102818372 | 0.074312511 | 0.086458029 |          |
|                       | rs4876115<br>rs6558504<br>rs17064153<br>rs4552929 | AAAA | 2.92E-10    | 0.000550166 | 0.000317278 |          |
|                       |                                                   | AAAG | 0.482195107 | 0.503431042 | 0.494384376 |          |
|                       |                                                   | AAGG | NA          | 0.00038842  | 0.000223062 |          |
|                       |                                                   | AGAA | 0.056245577 | 0.045678253 | 0.05014931  |          |
|                       |                                                   | AGAG | 0.26218562  | 0.265986201 | 0.264396851 | 0.0052   |
|                       |                                                   | GAAA | 5.61E-13    | NA          | 2.27E-13    | 16       |
|                       |                                                   | GAAG | 7.78E-10    | 5.86E-11    | 1.34E-10    |          |
|                       |                                                   | GGAA | 0.094897272 | 0.106753765 | 0.101700774 |          |
|                       |                                                   | GGAG | 0.001658051 | 0.002852316 | 0.00234621  |          |
|                       |                                                   | GGGA | 7.39E-11    | 2.01E-10    | 1.33E-10    |          |
|                       |                                                   | GGGG | 0.102818372 | 0.074359837 | 0.08648214  |          |
|                       | rs7005715<br>rs2977176<br>rs11987205              | AAAA | 7.00E-09    | NA          | 4.23E-11    | 0.0053   |
|                       |                                                   | AAGA | 0.168347284 | 0.150857208 | 0.158265968 | 73       |
|                       |                                                   | AAGA | 0.070307861 | 0.073735342 | 0.072244    |          |

|  |                                                   |      |             |             |             |        |
|--|---------------------------------------------------|------|-------------|-------------|-------------|--------|
|  | rs2977177                                         | ATAA | 2.49E-08    | 7.21E-08    | 2.57E-08    |        |
|  |                                                   | ATAG | 0.188437509 | 0.237702668 | 0.217006193 |        |
|  |                                                   | ATGA | 0.033241344 | 0.019114469 | 0.024916005 |        |
|  |                                                   | ATGG | 0.014846863 | 0.016088459 | 0.015600306 |        |
|  |                                                   | GAGA | 0.002708366 | 0.004111216 | 0.003498548 |        |
|  |                                                   | GTAA | 0.438963801 | 0.418357159 | 0.426893211 |        |
|  |                                                   | GTGA | 0.08314694  | 0.080033406 | 0.081575743 |        |
|  |                                                   | GTGG |             |             |             |        |
|  | rs2293909<br>rs11787218<br>rs7825359<br>rs4876123 | AAGA | NA          | 9.61E-11    | 1.30E-12    |        |
|  |                                                   | AAGG | NA          | 0.00192106  | 0.001072747 |        |
|  |                                                   | AGAA | 0.525895602 | 0.503977424 | 0.512992596 |        |
|  |                                                   | AGAG | 0.174275339 | 0.195792624 | 0.186960332 |        |
|  |                                                   | AGGA | 9.47E-06    | 0.000492771 | 0.00037037  |        |
|  |                                                   | AGGG | 0.034150955 | 0.046073286 | 0.040929137 | 0.0080 |
|  |                                                   | GAAA | NA          | 1.09E-10    | 2.44E-11    | 83     |
|  |                                                   | GAGA | NA          | NA          | 4.33E-10    |        |
|  |                                                   | GAGG | 0.049039034 | 0.058204437 | 0.054363128 |        |
|  |                                                   | GGAA | 0.004957086 | 0.009037917 | 0.007504073 |        |
|  |                                                   | GGAG | 0.002074478 | 0.00110683  | 0.001302448 |        |
|  |                                                   | GGA  | 0.003905288 | 0.003316213 | 0.003480985 |        |
|  |                                                   | GGG  | 0.205692746 | 0.180077437 | 0.191024184 |        |
|  | rs7465223<br>rs2293909<br>rs11787218<br>rs7825359 | AAAG | NA          | 0.001931515 | 0.00105125  |        |
|  |                                                   | AAGA | 0.694030766 | 0.690741419 | 0.692096333 |        |
|  |                                                   | AAGG | 0.004584529 | 0.007830218 | 0.006453557 |        |
|  |                                                   | AAGG | 0.04953923  | 0.058101122 | 0.05456069  |        |
|  |                                                   | AGAG | NA          | 0.000407168 | 0.000233204 | 0.0136 |
|  |                                                   | AGGA | 0.00287662  | 0.00201661  | 0.002366335 | 38     |
|  |                                                   | AGGG | 0.006284655 | 0.008946127 | 0.007887492 |        |
|  |                                                   | GAGA | 0.029442431 | 0.038807886 | 0.034841142 |        |
|  |                                                   | GAGG | 8.75E-05    | 3.45E-09    | 1.12E-08    |        |
|  |                                                   | GGAG | 0.006887085 | 0.009820081 | 0.00854242  |        |

|  |                                                   |                                                                                                      |                                                                                                                                                                                |                                                                                                                                                                           |                                                                                                                                                                                          |              |
|--|---------------------------------------------------|------------------------------------------------------------------------------------------------------|--------------------------------------------------------------------------------------------------------------------------------------------------------------------------------|---------------------------------------------------------------------------------------------------------------------------------------------------------------------------|------------------------------------------------------------------------------------------------------------------------------------------------------------------------------------------|--------------|
|  |                                                   | GGA<br>GGG                                                                                           | 0.206267199                                                                                                                                                                    | 0.181397851                                                                                                                                                               | 0.191967565                                                                                                                                                                              |              |
|  | rs17064153<br>rs4552929<br>rs9644313<br>rs9644258 | AAAG<br>AAGA<br>AGAA<br>AGAG<br>AGGA<br>AGGG<br>GAAA<br>GGAA<br>GGGA                                 | 6.51E-10<br>0.152821949<br>0.000532901<br>0.259915877<br>0.482866444<br>0.001044456<br>3.16E-09<br>0.102290829<br>0.000527539                                                  | 1.07E-09<br>0.152982182<br>0.000389204<br>0.263361013<br>0.508131602<br>0.000387742<br>1.29E-09<br>0.074748256<br>NA                                                      | 3.21E-10<br>0.152890459<br>0.000449768<br>0.261893482<br>0.497393516<br>0.000667573<br>1.08E-09<br>0.086481059<br>0.000224142                                                            | 0.0154<br>21 |
|  | rs17749622<br>rs6992443<br>rs7005715<br>rs2977176 | AAAA<br>AAAT<br>AAGA<br>AAGT<br>ATAA<br>ATAT<br>GAAA<br>GAAT<br>GAGA<br>GAGT<br>GTAA<br>GTAT<br>GTGT | 0.06406239<br>0.013705466<br>0.00804555<br>0.044144806<br>3.51E-08<br>NA<br>0.104274142<br>0.222720879<br>0.006812005<br>0.479755133<br>3.25E-08<br>0.055571085<br>0.000908477 | 0.054010459<br>0.008545343<br>0.010078203<br>0.032233084<br>NA<br>9.03E-05<br>0.096099242<br>0.24815894<br>0.006249232<br>0.470029722<br>0.000600924<br>0.073904543<br>NA | 0.058315376<br>0.010609415<br>0.009240011<br>0.037442122<br>6.89E-09<br>5.40E-09<br>0.099547241<br>0.23751017<br>0.006622238<br>0.473846776<br>0.000198898<br>0.066251079<br>0.000416661 | 0.015489     |
|  | rs7836020<br>rs4471073<br>rs11136419<br>rs2235114 | AAGA<br>AAGG<br>AGAA                                                                                 | 1.11E-08<br>0.000861324<br>0.36710215<br>0.052182652                                                                                                                           | 2.17E-09<br>4.55E-10<br>0.364698572<br>0.070235585                                                                                                                        | 4.56E-09<br>0.000394057<br>0.365905144<br>0.062335743                                                                                                                                    | 0.017812     |

|  |                                                   |      |             |             |             |          |
|--|---------------------------------------------------|------|-------------|-------------|-------------|----------|
|  |                                                   | AGAG | NA          | 0.000837047 | 0.000366445 |          |
|  |                                                   | GAAA | 0.003679751 | 0.001103112 | 0.002313039 |          |
|  |                                                   | GAAG | 0.005330661 | 0.005053639 | 0.005165353 |          |
|  |                                                   | GAGA | 0.114867292 | 0.092545119 | 0.102035699 |          |
|  |                                                   | GAGG | 0.28757968  | 0.302816374 | 0.296315652 |          |
|  |                                                   | GGAA | 0.16574817  | 0.16271055  | 0.164048158 |          |
|  |                                                   | GGAG | 0.001260984 | NA          | 0.000503837 |          |
|  |                                                   | GGGA | 0.001387324 | NA          | 0.000616869 |          |
|  |                                                   | GGGG |             |             |             |          |
|  | rs7825359<br>rs4876123<br>rs17749622<br>rs6992443 | AAAA | 0.028099135 | 0.017196391 | 0.022125645 |          |
|  |                                                   | AAGA | 0.502151677 | 0.493553113 | 0.496791485 |          |
|  |                                                   | AAGT | NA          | 0.002266193 | 0.001402281 |          |
|  |                                                   | AGAA | 0.007262265 | 0.004276532 | 0.005298481 |          |
|  |                                                   | AGAT | 6.74E-06    | 0.000678394 | 0.000361527 |          |
|  |                                                   | AGGA | 0.158170862 | 0.181489627 | 0.171855248 |          |
|  |                                                   | AGGT | 0.011511826 | 0.010454545 | 0.010924781 | 0.018923 |
|  |                                                   | GAAA | 0.000432509 | NA          | 0.000100999 |          |
|  |                                                   | GAGA | 0.003503231 | 0.003817102 | 0.003771448 |          |
|  |                                                   | GAGT | NA          | NA          | 1.74E-11    |          |
|  |                                                   | GGAA | 0.094157598 | 0.082806079 | 0.087720284 |          |
|  |                                                   | GGAT | NA          | 2.10E-09    | 3.35E-10    |          |
|  |                                                   | GGGA | 0.149777514 | 0.142520568 | 0.145641885 |          |
|  |                                                   | GGGT | 0.044926643 | 0.060941454 | 0.054005935 |          |
|  | rs6558504<br>rs17064153<br>rs4552929<br>rs9644313 | AAAG | 0.002153503 | 0.000818349 | 0.000451947 |          |
|  |                                                   | AAGA | 0.481110189 | 0.001128631 | 0.001596985 |          |
|  |                                                   | AAGG | NA          | 0.500774551 | 0.492382156 |          |
|  |                                                   | AGGA | 8.51E-08    | 0.000391458 | 0.000225016 | 0.023393 |
|  |                                                   | GAAA | 0.1503212   | 2.40E-05    | 4.39E-07    |          |
|  |                                                   | GAAG | 0.258460132 | 0.15213988  | 0.151399814 |          |
|  |                                                   | GAGA | 0.005136519 | 0.262602136 | 0.26078272  |          |
|  |                                                   |      |             | 0.00776424  | 0.006680738 |          |

|  |                                                   |                                                                                                      |                                                                                                                                                                           |                                                                                                                                                                                              |                                                                                                                                                                                              |          |
|--|---------------------------------------------------|------------------------------------------------------------------------------------------------------|---------------------------------------------------------------------------------------------------------------------------------------------------------------------------|----------------------------------------------------------------------------------------------------------------------------------------------------------------------------------------------|----------------------------------------------------------------------------------------------------------------------------------------------------------------------------------------------|----------|
|  |                                                   | GAGG<br>GGGA<br>GGGG                                                                                 | 0.102158636<br>0.000659735                                                                                                                                                | 0.074356799<br>NA                                                                                                                                                                            | 0.08623286<br>0.000247326                                                                                                                                                                    |          |
|  | rs9644258<br>rs9644315<br>rs10448097<br>rs7836020 | AAAA<br>AAAG<br>AAGA<br>AAGG<br>ACAG<br>ACGA<br>ACGG<br>GAAA<br>GAAG<br>GAGA<br>GAGG<br>GCAG<br>GCGA | NA<br>0.1021026<br>0.009165058<br>0.144034679<br>0.000632141<br>0.403695827<br>0.079409361<br>0.00381786<br>0.25357266<br>0.000774658<br>0.000102422<br>NA<br>0.002692734 | 0.000513822<br>0.073873467<br>0.008655355<br>0.146166664<br>0.001319561<br>0.424408831<br>0.081398178<br>0.000514124<br>0.261889018<br>0.000414893<br>0.000418952<br>1.39E-10<br>0.000427134 | 0.000292547<br>0.085857054<br>0.008968036<br>0.145009759<br>0.001042293<br>0.415806385<br>0.080517575<br>0.001850125<br>0.258445753<br>0.000529444<br>0.000492618<br>1.71E-10<br>0.001188412 | 0.024353 |
|  | rs9644313<br>rs9644258<br>rs9644315<br>rs10448097 | AAAA<br>AAAG<br>AGAA<br>AGAG<br>AGCG<br>GAAA<br>GAAG<br>GACA<br>GACG<br>GGAG<br>GGCA<br>GGCG         | 0.102141561<br>0.000818629<br>0.257460398<br>0.001691833<br>0.000630861<br>NA<br>0.151457516<br>0.000523301<br>0.484098659<br>NA<br>1.06E-09<br>0.001177241               | 0.074108461<br>0.001142672<br>0.262446073<br>0.000266082<br>0.000533047<br>0.000390083<br>0.15256013<br>0.001165374<br>0.506969531<br>0.000418546<br>NA<br>NA                                | 0.086030231<br>0.001021102<br>0.260341228<br>0.000880697<br>0.000551937<br>0.000224621<br>0.152067913<br>0.000891693<br>0.497258303<br>0.000243321<br>1.61E-12<br>0.000488955                | 0.024726 |
|  | rs4552929                                         |                                                                                                      | 0.000298347                                                                                                                                                               | NA                                                                                                                                                                                           | 3.00E-05                                                                                                                                                                                     | 0.026559 |

|  |                                                    |                                                                                      |                                                                                                                                                                |                                                                                                                                        |                                                                                                                                                               |          |
|--|----------------------------------------------------|--------------------------------------------------------------------------------------|----------------------------------------------------------------------------------------------------------------------------------------------------------------|----------------------------------------------------------------------------------------------------------------------------------------|---------------------------------------------------------------------------------------------------------------------------------------------------------------|----------|
|  | rs9644313<br>rs9644258<br>rs9644315                | AAGA<br>AGAA<br>AGAC<br>GAAA<br>GAGA<br>GAGC<br>GGAA<br>GGAC<br>GGGA<br>GGGC         | 0.150023025<br>5.67E-09<br>0.102936149<br>0.258729072<br>0.000755484<br>0.001583344<br>0.484497142<br>NA<br>0.001177431                                        | 0.152982184<br>NA<br>0.075259907<br>0.262836941<br>0.000390909<br>0.001899078<br>0.50619601<br>0.000434971<br>NA                       | 0.151816511<br>5.60E-10<br>0.087044426<br>0.261091518<br>0.000642532<br>0.001762564<br>0.496870727<br>0.000253072<br>0.000488664                              |          |
|  | rs11787218<br>rs7825359<br>rs4876123<br>rs17749622 | AGAG<br>AGGA<br>AGGG<br>GAAA<br>GAAG<br>GAGA<br>GAGG<br>GGAA<br>GGAG<br>GGGA<br>GGGG | 1.01E-08<br>0.000627594<br>0.048565142<br>0.028451248<br>0.502438329<br>0.006301601<br>0.170011328<br>0.000437506<br>0.003505203<br>0.094140298<br>0.145521741 | NA<br>NA<br>0.060145862<br>0.017724161<br>0.495264264<br>0.003757772<br>0.193168598<br>NA<br>0.003835286<br>0.083475464<br>0.142628593 | 1.49E-12<br>0.000266421<br>0.055238937<br>0.022594432<br>0.497927244<br>0.004584971<br>0.183652802<br>0.000100279<br>0.00378505<br>0.088060834<br>0.143789031 | 0.026743 |
|  | rs4471073<br>rs11136419<br>rs2235114<br>rs4876121  | AAAG<br>AAGA<br>AAGG<br>AGAG<br>AGGA<br>AGGG<br>GAAA<br>GAAG<br>GAGA                 | 2.72E-10<br>0.001701839<br>0.001968812<br>0.005014851<br>0.001105556<br>0.114947981<br>NA<br>0.655465079<br>0.156044187                                        | 0.000594598<br>0.000246078<br>0.001096748<br>0.004877615<br>0.000980664<br>0.091740481<br>4.94E-12<br>0.667826881<br>0.159501376       | 0.000325712<br>0.000862145<br>0.00148738<br>0.004931386<br>0.001038891<br>0.101627033<br>3.16E-12<br>0.66258532<br>0.158028417                                | 0.027863 |

|  |                                                     |      |             |             |             |          |
|--|-----------------------------------------------------|------|-------------|-------------|-------------|----------|
|  |                                                     | GAGG | 0.061086307 | 0.073135558 | 0.067990929 |          |
|  |                                                     | GGAG | 0.000793557 | NA          | 0.000340749 |          |
|  |                                                     | GGGA | 0.000334221 | NA          | 0.000141689 |          |
|  |                                                     | GGGG | 0.001537609 | NA          | 0.00064035  |          |
|  | rs7837154<br>rs6980953<br>rs7839980<br>rs4876113    | CAAG | 5.83E-07    | 7.14E-12    | 6.59E-10    | 0.028939 |
|  |                                                     | CACG | NA          | 2.30E-10    | 1.64E-10    |          |
|  |                                                     | CGAA | 0.388080993 | 0.419727625 | 0.406245251 |          |
|  |                                                     | CGCA | NA          | 3.47E-11    | 3.97E-11    |          |
|  |                                                     | CGCG | NA          | 0.000387299 | 0.0002225   |          |
|  |                                                     | GAAA | NA          | 1.76E-09    | 1.06E-12    |          |
|  |                                                     | GAAG | 0.00052348  | 0.001658729 | 0.001155731 |          |
|  |                                                     | GACA | 0.00052299  | 0.000774594 | 0.00066758  |          |
|  |                                                     | GACG | 0.254694074 | 0.22955738  | 0.240284114 |          |
|  |                                                     | GGAA | 0.35617788  | 0.347111624 | 0.350977138 |          |
|  |                                                     | GGCA | NA          | 0.000782747 | 0.000447685 |          |
|  | rs35821406<br>rs13280292<br>rs11988994<br>rs7837154 | CAAC | NA          | 4.59E-07    | 2.70E-06    | 0.032271 |
|  |                                                     | CAAG | NA          | 0.000393778 | 0.000223394 |          |
|  |                                                     | CAGG | 0.19516877  | 0.178063409 | 0.18535265  |          |
|  |                                                     | CGAC | 0.000522263 | 0.001458089 | 0.001005019 |          |
|  |                                                     | CGAG | 1.25E-06    | 0.000492568 | 0.000336437 |          |
|  |                                                     | CGGG | 0.002110048 | 0.003537959 | 0.002929517 |          |
|  |                                                     | GAAG | NA          | 0.000383598 | 0.000220677 |          |
|  |                                                     | GAGG | 0.002117243 | 0.003569071 | 0.00294817  |          |
|  |                                                     | GGAC | 0.386978538 | 0.418595799 | 0.405119342 |          |
|  |                                                     | GGAG | 0.412079044 | 0.392382698 | 0.400782873 |          |
|  |                                                     | GGGC | 0.000522626 | NA          | 0.000280514 |          |
|  |                                                     | GGGG | 0.000500216 | 0.001122574 | 0.000798712 |          |
|  | rs11136415<br>rs736235                              | AAAA | NA          | 0.000167098 |             |          |
|  |                                                     | AAGA | 0.001635554 | 0.001815054 | 1.75E-07    |          |

|  |                                                   |                                                                                              |                                                                                                                                                                           |                                                                                                                                                                    |                                                                                                                                                                           |          |
|--|---------------------------------------------------|----------------------------------------------------------------------------------------------|---------------------------------------------------------------------------------------------------------------------------------------------------------------------------|--------------------------------------------------------------------------------------------------------------------------------------------------------------------|---------------------------------------------------------------------------------------------------------------------------------------------------------------------------|----------|
|  | rs7009291<br>rs2956943                            | AAGG<br>ACAG<br>ACGA<br>ACGG<br>GAAA<br>GCAA<br>GCAG<br>GCGA<br>GCGG                         | 0.25880286<br>0.000532583<br>0.300058497<br>2.68E-09<br>NA<br>0.056747842<br>0.00176657<br>0.366607309<br>0.013848783                                                     | 0.241627437<br>NA<br>0.286052459<br>0.003645466<br>1.66E-08<br>0.050120653<br>0.001652107<br>0.410855511<br>0.0040642                                              | 0.001838838<br>0.248939111<br>0.000254667<br>0.292017818<br>0.002011636<br>5.70E-12<br>0.05287629<br>0.001835001<br>0.392106988<br>0.008119477                            |          |
|  | rs4876123<br>rs17749622<br>rs6992443<br>rs7005715 | AAAA<br>AAAG<br>AGAA<br>AGAG<br>AGTA<br>GAAA<br>GAAG<br>GATA<br>GGAA<br>GGAG<br>GGTA<br>GGTG | 0.008435813<br>0.017760032<br>0.091439309<br>0.417462839<br>1.81E-09<br>0.06633984<br>0.037422558<br>3.74E-09<br>0.238429691<br>0.066175769<br>0.055689372<br>0.000844773 | 0.005591544<br>0.011936561<br>0.078265248<br>0.41847067<br>0.002430287<br>0.057991923<br>0.029437349<br>2.10E-08<br>0.265293143<br>0.05874566<br>0.071837594<br>NA | 0.006862141<br>0.014411174<br>0.083456069<br>0.41815666<br>0.00154133<br>0.06142596<br>0.032907655<br>5.13E-09<br>0.254400778<br>0.061676969<br>0.064745909<br>0.00041535 | 0.036296 |
|  | rs4876086<br>rs1990126<br>rs9918795<br>rs7815979  | AAAG<br>AAGG<br>AGGA<br>AGGG<br>GAAG<br>GAGA<br>GAGG<br>GGAA                                 | NA<br>0.218679491<br>0.00123304<br>0.000863835<br>0.100729343<br>NA<br>0.002616219<br>1.19E-09                                                                            | 5.09E-12<br>0.240484643<br>0.002223069<br>0.00245108<br>0.082106892<br>0.00044257<br>0.004226813<br>NA                                                             | 6.12E-13<br>0.231267<br>0.00181124<br>0.001695204<br>0.08997081<br>0.00025667<br>0.003536755<br>4.76E-11                                                                  | 0.041505 |



|  |                                                   |      |             |             |             |          |
|--|---------------------------------------------------|------|-------------|-------------|-------------|----------|
|  |                                                   | GGAG | 0.000523266 | 1.53E-09    | 0.000291529 |          |
|  |                                                   | GGGA | 0.490938149 | 0.496947064 | 0.494374954 |          |
|  |                                                   | GGGG | 0.184416658 | 0.171117867 | 0.176795839 |          |
|  | rs17748677<br>rs4876086<br>rs1990126<br>rs9918795 | AAAG | 0.218680848 | 0.240484947 | 0.231249099 | 0.043754 |
|  |                                                   | AAGG | 0.00122247  | 0.003485327 | 0.002443969 |          |
|  |                                                   | AGAA | 0.100728083 | 0.08210689  | 0.089989027 |          |
|  |                                                   | AGAG | 0.002416561 | 0.00348187  | 0.002958109 |          |
|  |                                                   | AGGA | 0.000524526 | NA          | 0.000273311 |          |
|  |                                                   | AGGG | 0.500018326 | 0.505263822 | 0.503121886 |          |
|  |                                                   | CAAG | 1.60E-09    | 3.86E-09    | 1.61E-09    |          |
|  |                                                   | CAGG | 0.000874122 | 0.00118851  | 0.00108147  |          |
|  |                                                   | CGAG | 0.000199558 | 0.001189089 | 0.000836085 |          |
|  |                                                   | CGGG | 0.175335504 | 0.162799538 | 0.16804704  |          |
|  | rs6558479<br>rs17748677<br>rs4876086<br>rs1990126 | AAAA | 0.00179726  | 0.000461026 | 0.0010416   | 0.044639 |
|  |                                                   | AAAG | NA          | NA          | 8.15E-11    |          |
|  |                                                   | AAGA | 0.00092919  | 1.02E-09    | 0.000389786 |          |
|  |                                                   | AAGG | 0.354283559 | 0.336537023 | 0.344097586 |          |
|  |                                                   | ACGG | 0.00154949  | 0.001111942 | 0.001291837 |          |
|  |                                                   | GAAA | 0.216977309 | 0.240037509 | 0.230196868 |          |
|  |                                                   | GAAG | 0.001619112 | 0.003466077 | 0.002701906 |          |
|  |                                                   | GAGA | 0.102321267 | 0.085688446 | 0.092777208 |          |
|  |                                                   | GAGG | 0.145663118 | 0.168630694 | 0.158827006 |          |
|  |                                                   | GCAA | NA          | NA          | 2.30E-10    |          |
|  |                                                   | GCAG | 0.00073915  | 0.00119418  | 0.000992826 |          |
|  |                                                   | GCGA | 2.59E-08    | 0.001203683 | 0.000707287 |          |
|  |                                                   | GCGG | 0.17412052  | 0.161669419 | 0.166976091 |          |
|  | rs10448097<br>rs7836020<br>rs4471073              | AAGA | 0.003469337 | 0.001005137 | 0.002037272 | 0.045250 |
|  |                                                   | AGAA | 0.001773597 | 0.001939499 | 0.00171978  |          |

|  |            |      |             |             |             |  |
|--|------------|------|-------------|-------------|-------------|--|
|  | rs11136419 | AGAG | 0.116132009 | 0.088895374 | 0.100432356 |  |
|  |            | AGGA | 0.236770224 | 0.246269983 | 0.24246273  |  |
|  |            | AGGG | 0.001980094 | NA          | 0.000835633 |  |
|  |            | GAAA | 2.21E-09    | NA          | 1.21E-10    |  |
|  |            | GAAG | 0.000872994 | NA          | 0.000403953 |  |
|  |            | GAGA | 0.415803805 | 0.433929023 | 0.426193724 |  |
|  |            | GGAA | 0.001897522 | 1.11E-08    | 0.000957275 |  |
|  |            | GGAG | 0.004062915 | 0.008703387 | 0.006760406 |  |
|  |            | GGGA | 0.2165658   | 0.219257587 | 0.217911185 |  |
|  |            | GGGG | 0.0006717   | NA          | 0.000285686 |  |

<sup>1</sup>Four SNPs represented in the haplotype window; <sup>2</sup>P value for association of all haplotypes at corresponding four SNPs tested; <sup>3</sup>Number of windows tested in gene.
